# Supplementary material for: Absorption and Tissue Distribution of Siphonaxanthin from Green Algae
Source: MDPI journal article supplement (doi:10.3390/md18060291), 2020-06-01
Supplement: s1 [file s1]

**Supplemental Table 1.** Maximum absorbance of UV-vis spectra and LC–MS data in the positive ion mode of compounds identified in small intestine samples of mice at the end of the 16-day dietary supplementation with siphonaxanthin.

| Peak number | Compound       | Maximum absorbance (nm) | Formula <sup>1</sup>                                     | Retention time (min) | Predicted Ion                        | Predicted m/z | Observed m/z | Error (ppm) |
|-------------|----------------|-------------------------|----------------------------------------------------------|----------------------|--------------------------------------|---------------|--------------|-------------|
| 1           | Unidentified   | 459                     | C <sub>40</sub> H <sub>52</sub> O <sub>4</sub> predicted | 22                   | [M+H] <sup>+</sup>                   | 597.3938      | 597.3820     | -19.75      |
|             |                |                         |                                                          |                      | [M+H-H <sub>2</sub> O] <sup>+</sup>  | 579.3833      | 579.3779     | -9.32       |
|             |                |                         |                                                          |                      | [M+H] <sup>+</sup>                   | 599.4095      | 599.4002     | -15.52      |
| 2           | Unidentified   | 452                     | C <sub>40</sub> H <sub>54</sub> O <sub>4</sub> predicted | 25                   | [M+H-H <sub>2</sub> O] <sup>+</sup>  | 581.3989      | 581.3764     | -38.70      |
|             |                |                         |                                                          |                      | [M+H-2H <sub>2</sub> O] <sup>+</sup> | 563.3884      | 563.3693     | -33.90      |
|             |                |                         |                                                          |                      | [M+H-H <sub>2</sub> O] <sup>+</sup>  | 581.3989      | 581.3953     | -6.19       |
| 3           | Unidentified   | 457                     | C <sub>40</sub> H <sub>54</sub> O <sub>4</sub> predicted | 28                   | [M+H-2H <sub>2</sub> O] <sup>+</sup> | 563.3884      | 563.3899     | 2.66        |
|             |                |                         |                                                          |                      | [M+H-H <sub>2</sub> O] <sup>+</sup>  | 583.4146      | 583.4070     | -13.03      |
|             |                |                         |                                                          |                      | [M+H-2H <sub>2</sub> O] <sup>+</sup> | 565.4040      | 565.4023     | -3.01       |
| 4           | Siphonaxanthin | 454                     | C <sub>40</sub> H <sub>56</sub> O <sub>4</sub>           | 30                   | [M+H-3H <sub>2</sub> O] <sup>+</sup> | 547.3934      | 547.3920     | -2.56       |
|             |                |                         |                                                          |                      |                                      |               |              |             |

<sup>1</sup> The formulas of peaks 1, 2 and 3 were speculated based on the previous reports of the other carotenoids (such as lutein and zeaxanthin) which have similar structures with siphonaxanthin.
